# Supplementary material for: OGRDB: a reference database of inferred immune receptor genes
Source: PubMed Central journal article supplement (PMC6943078; doi:10.1093/nar/gkz822), 2019-09-30
Supplement: gkz822_supplemental_file.pdf [file gkz822_supplemental_file.pdf]

## **OGRDB – a reference database of inferred immune receptor genes**

*List of AIRR Community members endorsing this manuscript*

Adam Buntzman, University of Arizona  
Anne Eugster, CRRD TU Dresden  
Bjoern Peters, La Jolla Institute for Immunology  
Brian Corrie, Simon Fraser University  
Brian G. Pierce, University of Maryland Institute for Bioscience and Biotechnology Research  
Camila H. Coelho, National Institute of Allergy and Infectious Diseases, Institutes of Health, Bethesda, MD, USA  
Chaim Schramm, Vaccine Research Center, National Institute of Allergy and Infectious Diseases, NIH, Bethesda, MD, USA  
Christopher Tipton, Emory University  
Collin Joyce, The Scripps Research Institute  
Daniel Douek, National Institutes of Health  
David G. Coffey, Fred Hutchinson Cancer Research Center  
Davide Bagnara, University of Genoa, Department of Experimental Medicine, Genoa, Italy  
Duncan Ralph, Fred Hutchinson Cancer Research Center  
Eline T. Luning Prak, Perelman School of Medicine, University of Pennsylvania  
Eric Waltari, Chan Zuckerberg Biohub  
Felix Breden, Simon Fraser University  
George Blanck, University of South Florida  
Gregory C. Ippolito, University of Texas at Austin  
Henk-Jan van den Ham, ENPICOM B.V.  
Inaki Sanz, Emory University  
Inimary Toby, University of Dallas, Department of Biology  
Jacob S. Sherkow, Harvard University  
Jason Wilson, CDC  
Jean-Philippe Buerckert, BISC Global  
Johannes Trück, University Children's Hospital Zurich and the Children's Research Center, University of Zurich, Zurich, Switzerland  
Lindsay Cowell,  
Ludvig M. Sollid, University of Oslo  
Manu Shankar-Hari, King's College London  
Marcelo Macedo Brigido, Universidade de Brasilia  
Ning Jiang, The University of Texas at Austin  
Pei-Lung Chen, Graduate Institute of Medical Genomics and Proteomics, National Taiwan University  
Ramit Mehr, Bar-Ilan University  
Sandra C A Nielsen, Stanford University  
Scott Christley, UT Southwestern Medical Center  
Sol Efroni, Bar Ilan University  
Steven Kleinstein, Yale School of Medicine  
Susana Magadan, University of Vigo  
Susanna Marquez, Yale University  
Theam Soon Lim, Institute for Research in Molecular Medicine, Universiti Sains Malaysia  
Thomas MacCarthy, Stony Brook University

Tilman Schneider-Hohendorf, University of Muenster, Germany, Department of Neurology with  
Institute of Translational Neurology

Uri Laserson, Icahn School of Medicine at Mount Sinai

Yoshinobu Koguchi, Earle A. Chiles Research Institute, Providence Cancer Institute
